# Supplementary material
Source: PubMed Central journal article supplement (PMC4812576)
Supplement: NIHMS758151-supplement-Supplemental_Figures.pdf [file NIHMS758151-supplement-Supplemental_Figures.pdf]

Gierut, Wood et al. Supplementary Figures

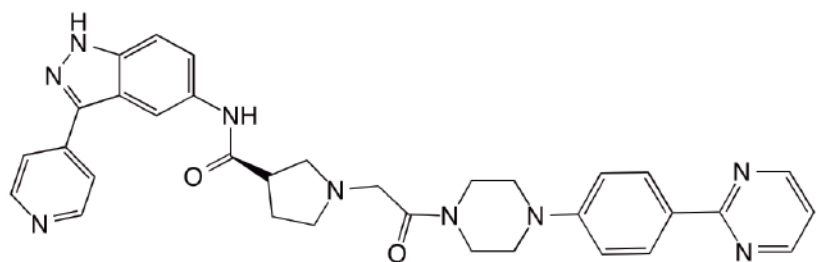

SCH772984 (Erk inhibitor)

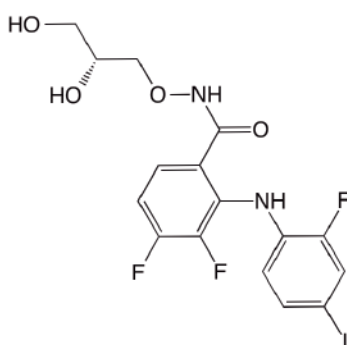

PD325901 (Mek inhibitor)

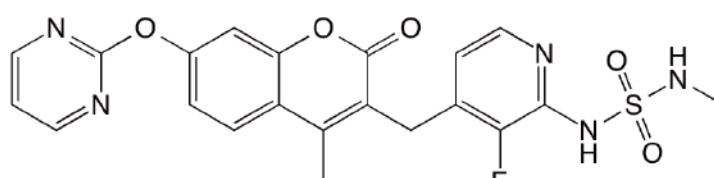

CH5126766 (Mek inhibitor)

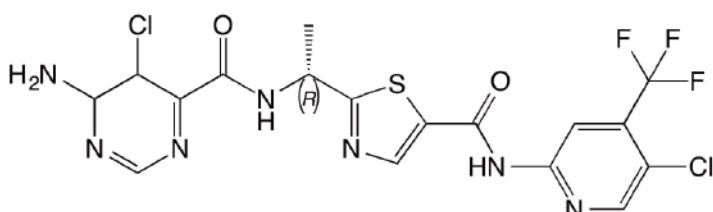

MLN2480 (Raf inhibitor)

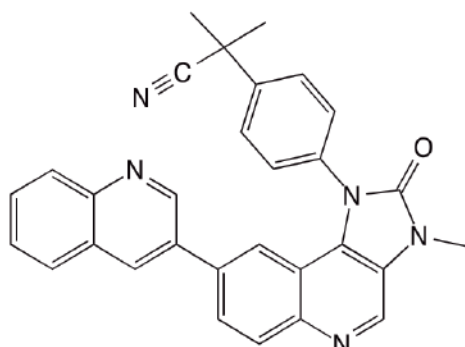

NVP-BEZ235 (PI3K inhibitor)

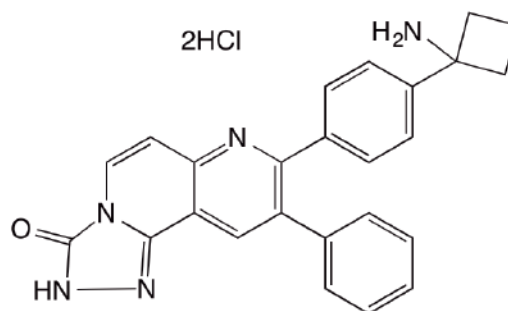

MK2206 (Akt inhibitor)

Fig. S1. Chemical structures of phosphoprotein signaling inhibitors.

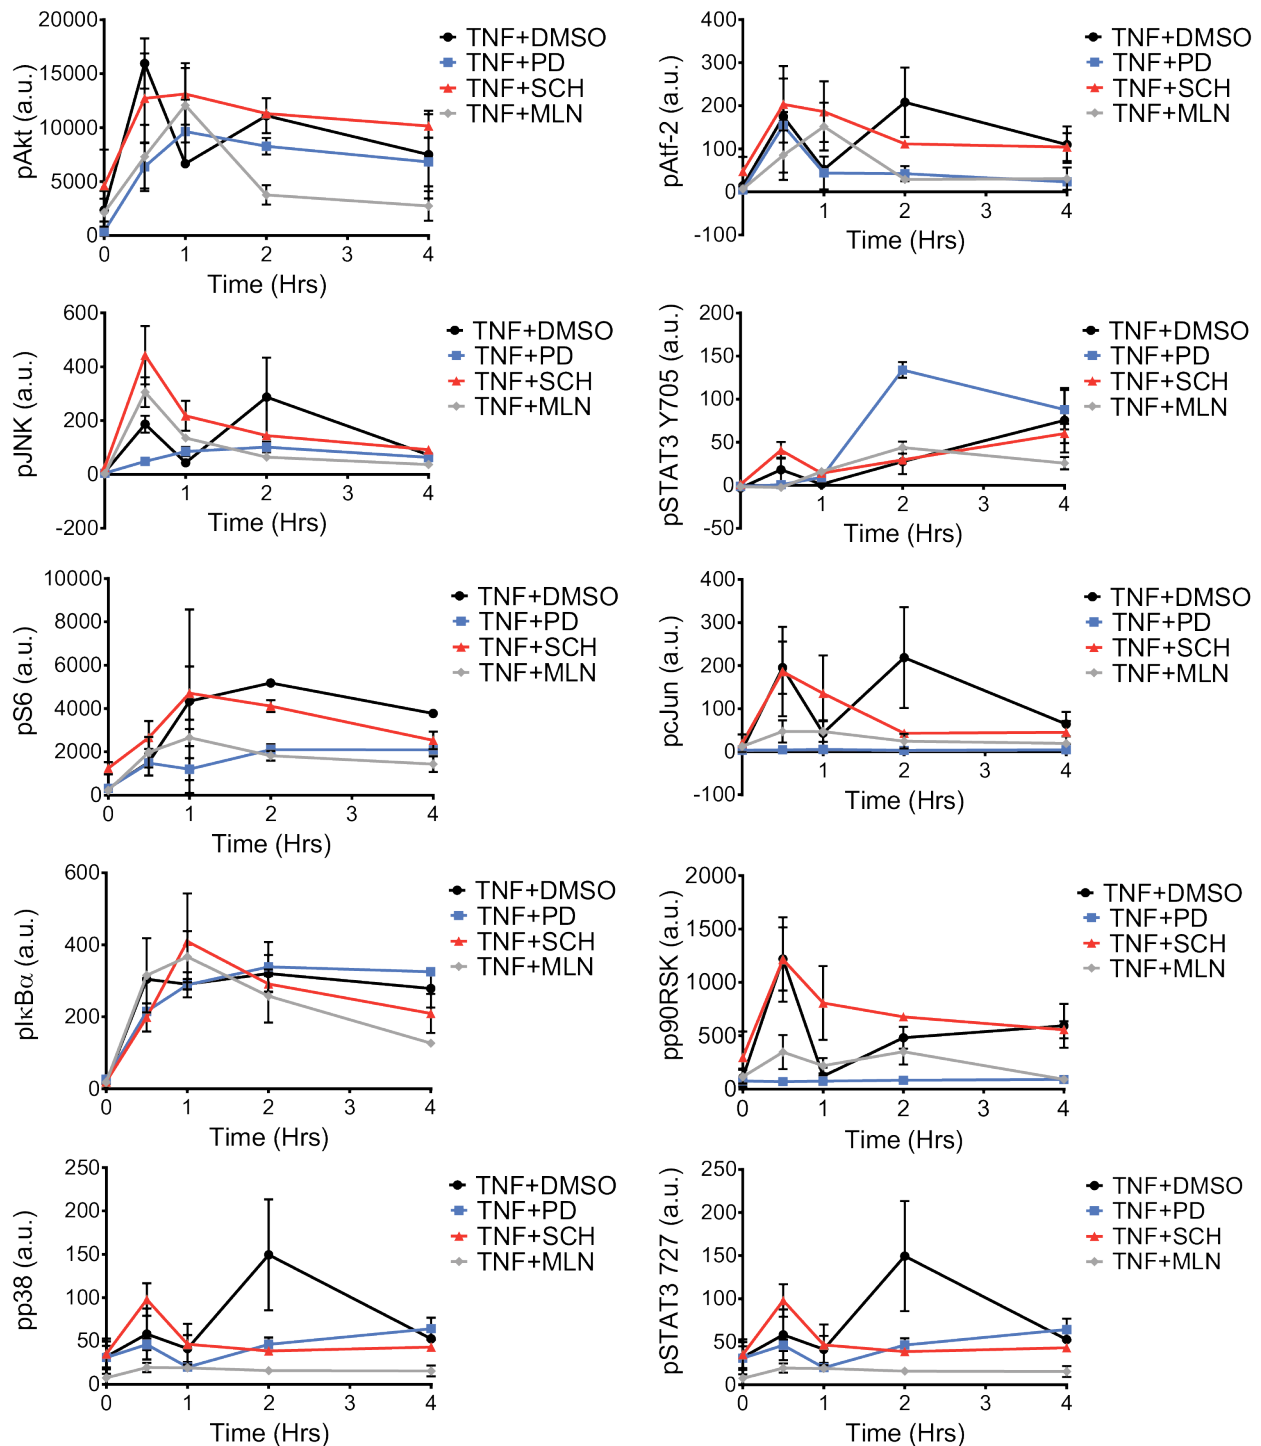

**Fig. S2. MAPK pathway inhibitors alter the TNF- $\alpha$ -induced flux through multiple cellular signaling pathways ( $N=3-5$  per time point; mean $\pm$ SE).** Mice were pretreated (as described in Materials and Methods) with DMSO (as a vehicle control), the MEK inhibitor PD325901 (PD), the ERK inhibitor SCH772984 (SCH), or the RAF inhibitor MLN2480 (MLN), as indicated, before being treated with TNF- $\alpha$  for the indicated times. Intestinal epithelia from the mice were then analyzed by Bio-Plex to determine the relative abundances of the indicated phosphoproteins. Data are means  $\pm$  SEM of three to five animals per time point.

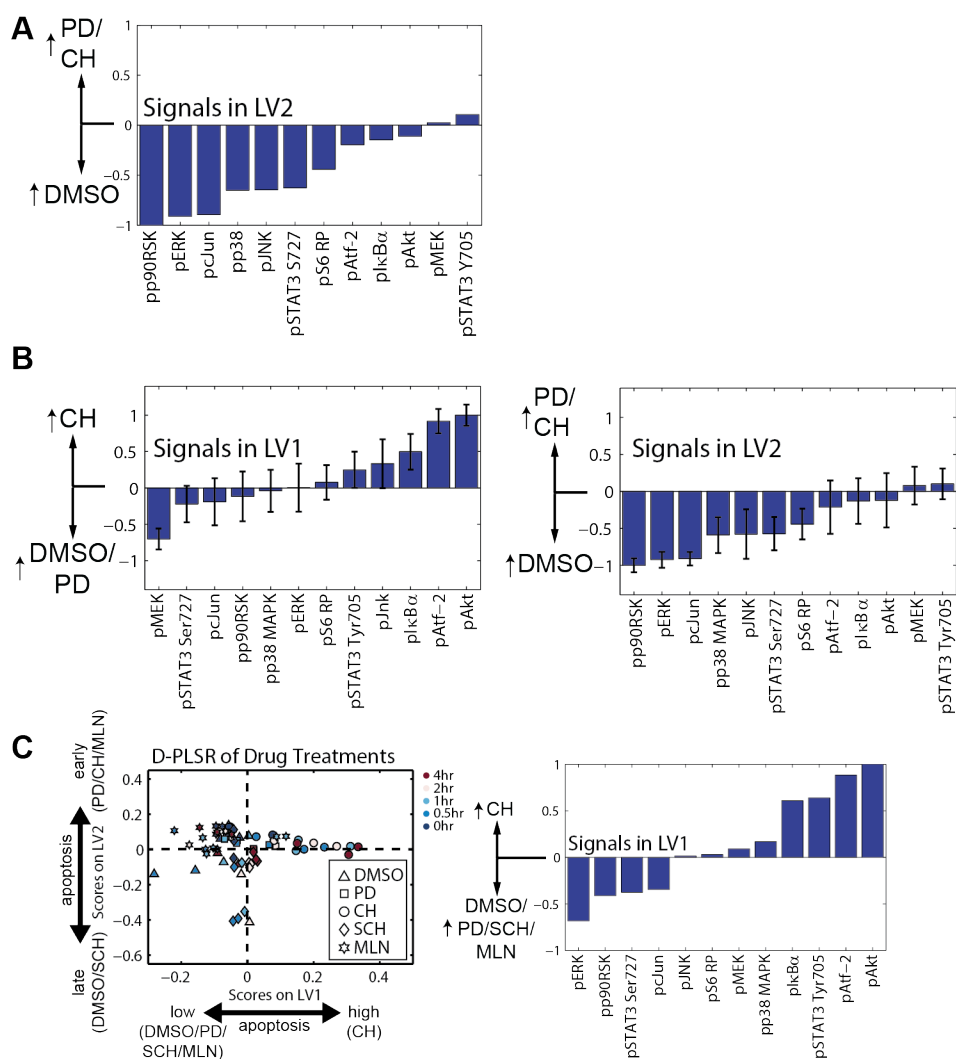

**Fig. S3. D-PLSR analysis of the phosphoprotein signaling network.** (A) Signals in LV2 separating DMSO-treated samples from CH5126766- and PD325901-treated samples in the scores plot. (B) Means $\pm$ SD of signals in LV1 and LV2 from the three-condition model. SD was computed with a Monte-Carlo sub-sampling of the dataset used in Fig. 4A. (C) D-PLSR regression model constructed using the DMSO, PD, CH, SCH, and MLN conditions shows a scores plot and LV1 values that are similar to those shown in Fig. 4A.



**Fig. S4. SOM analysis of the phosphoprotein signaling network. (A)** Replicates (1) and (2) of each signaling data point presented to the SOM in Fig. 4C for nodal training. **(B)** Component planes illustrate the activation of regions of the map that correspond to different phosphoprotein signaling nodes, as illustrated in Fig 4C. **(C)** SOMs generated using the DMSO, PD, CH, SCH, and MLN conditions.

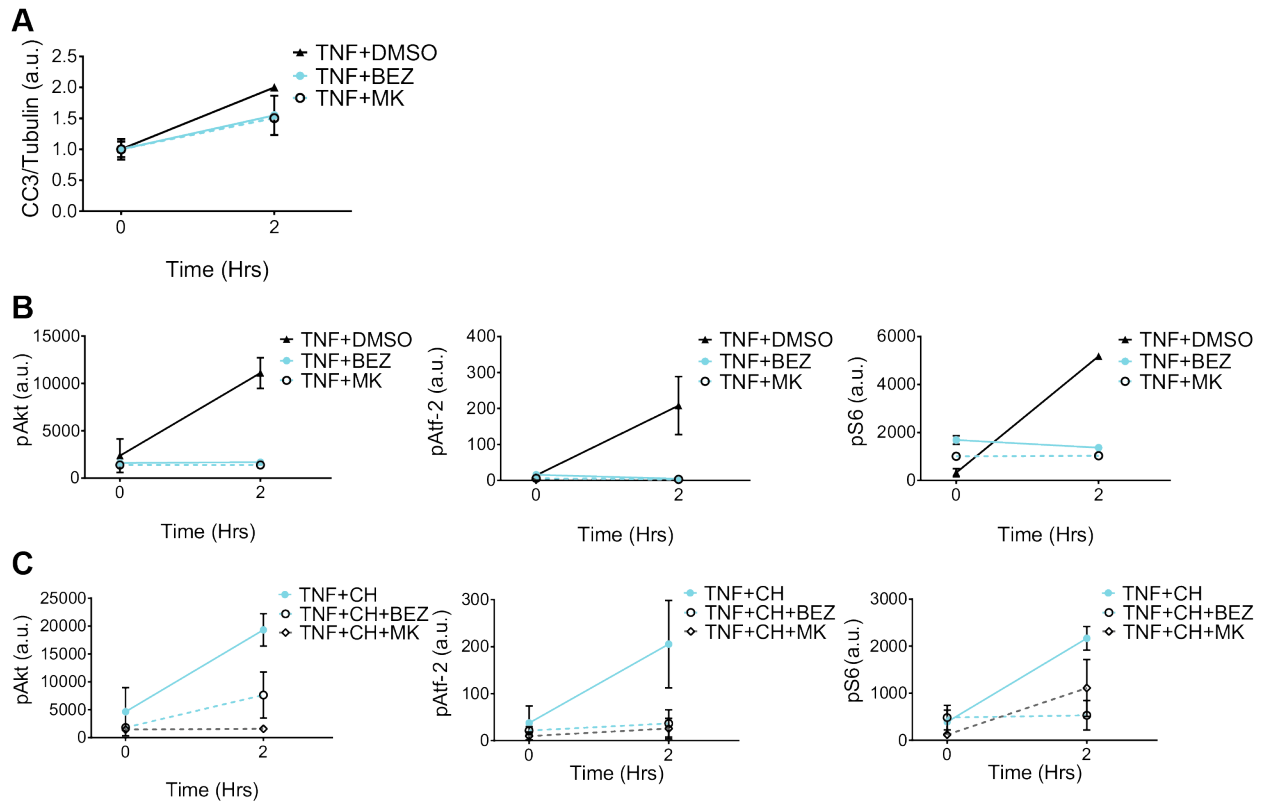

**Fig. S5. Influence of the Akt pathway inhibitors (BEZ235 and MK2206) on CC3 abundance and phosphoprotein signaling.** (A and B) Mice were pretreated with DMSO, the PI3K inhibitor NVP-BEZ235 (BEZ), or the Akt inhibitor MK2206 (MK), as indicated, before being treated with TNF- $\alpha$  for the indicated times. Intestinal epithelia from the mice were then analyzed by Bio-Plex to determine (A) the relative abundance of cleaved caspase-3 (CC3), normalized to that of tubulin, and (B) the relative abundances of the indicated phosphoproteins. Data in (A) and (B) are means  $\pm$  SEM of two or three experiments per time point. (C) Mice were pretreated with the MEK inhibitor CH5126766 (CH) in the presence or absence of the PI3K inhibitor NVP-BEZ235 (BEZ) or the Akt inhibitor MK2206 (MK), as indicated, before being treated with TNF- $\alpha$  for the indicated times. Intestinal epithelia from the mice were then analyzed by Bio-Plex to determine the relative abundances of the indicated phosphoproteins. Data are means  $\pm$  SEM of three to five experiments per time point.
